# Supplementary material for: Antifreeze protein dispersion in eelpouts and related fishes reveals migration and climate alteration within the last 20 Ma
Source: PubMed Central journal article supplement (PMC7737890; doi:10.1371/journal.pone.0243273), 2020-12-15
Supplement: pone.0243273.s003.pdf [file pone.0243273.s003.pdf]

1 5 10 20 30 40 50 60 70

iiii i i i i i i i i i i

notched-fin eelpout-Q1 mksviltgllfvllcvdhmssaNQ-ESVVAALIPINTALTVGMMTRRVVSPGTGIPAEIDPRLISMQVNRQAVPMGTTLMPDMVKFYCLCAPKN  
viviparous-eelpout-Q1† mksviltgllfvllcvdhmssaNQ-ESVVAALIPINTALTVGMMTRRVVSPGTGIPAEIDPRLISMQVNRQAVPMGTTLMPDMVKFYCLCAPKN  
ocean pout-Q1\* -----cvdhmssaNQ-ESVVAALIPINTALTVGMMTRRVVTPVGTGIPAEIDPRLISMQVNRQAVPMGTTLMPDMVKFYCLCAPKN  
ocean pout-Q2 mksviltgllfvllcvdhmssaNQ-ESVVAALIPINTALTVGMMTRRVVYPTGIPAEIDPRLISMQVNRQAVPMGTTLMPDMVKFYCLCAPKN  
Atlantic wolffish-Q1 mksailtgllfvllcvdhmssaHQ-ASVVAALIPINTALTVGMMTRRVVFPPTGIPAEIDPRLISMQVNRQAVPMGTTLMPDMVKFYCLCAPKTQRW  
Atlantic wolffish-Q2 ---ailtgllfvllcvdhmssaNQ-ASVVAALIPINTALTVGMMTTAVVTPGTGIPAEIDPRLISMQVNRQAVPMGTTLMPDMVKFYCLCAPKY  
Alaskan ronquill-Q1\* -----hmssaK-GDSVVAALIPINTALTVGMMTGADVTPGTGIPAEIDPRLISMQVNRQAVPMGTTLMPDMVKFYCLC  
ocean pout-Q3 mksviltgllfvllcvdhmssaNQ-ESVVAALIPINTALTVGMMTRRVVYPTGIPAEIDPRLISMQVNRQAVPMGTTLMPDMVKGYPL-T  
notched-fin eelpout-Q2 mksviltgllfvllcvdhmssaNQ-ESVVAALIPINTALTVGMMTRRVVSPGTGIPAEIDPRLISMQVNRQAVPMGTTLMPDMVKGYAP-A  
viviparous-eelpout-Q2† mksviltgllfvllcvdhmssaNQ-ESVVAALIPINTALTVGMMTRRVVSPGTGIPAEIDPRLISMQVNRQAVPMGTTLMPDMVKFYCLC  
ocean pout-Q4\* -----cvdhmssaNQ-ASVVAALIPINTALTVGMMRSKVVTPMGIPAEIDPRLISMQVNRQAVACGTTLMPDMVKYTP-AK  
viviparous eelpout-Q3† mksviltgllfvllcvdhmssaNQ-ASVVAALIPINTALTVGMMKAKVVTMPGIPAEIDPRLISMQVNRQAVACGTTLMPDMVKYTP-VK  
notched-fin eelpout-Q3 mksviltgllfvllcvdhmssaNQ-ASVVAALIPINTALTVGMMKAKVATPMGIPAEIDPRLISMQVNRQAVACGTTLMPDMVKYTP-VK  
ocean pout-Q5\* -----cvdhmssaNQ-ASVVAALIPINTALTVGMMRSKVVTPMGIPAEIDPRLISMQVNRQAVPMGTTLMPDMVKGYPP-A  
radiated shanny-Q1\* mksviltgllfvllcvdhmssaASGGQSVVAALIPINTALTVGMMRAEVVSPGIPAEIDPRLISMQVNRQAVPLGTTLMPDMVKGYSP-AK  
rock gunnel-Q1\* mksailtgllfvllcvdhmssaSAGKGSVVAALIPINTALTRIMKKAELVAPMGIPAEIDPRLISMQVNRQAVPMGTTLMPDMVKYQAP-AK  
viviparous eelpout-Q4† mksailtgllfvllcvdhmssaNQ-ASVVAALIPINTALTVGMMKAEVVTMPGIPAEIDPRLISMQVNRQAVPLGTTLMPDMVKGYTP-A  
notched-fin eelpout-Q4 mksviltgllfvllcvdhmssaNQ-ASVVAALIPINTALTVGMMKAEVVTMPGIPAEIDPRLISMQVNRQAVPLGTTLMPDMVKGYTP-A  
viviparous-eelpout-Q5† mksviltgllfvllcvdhmssaDQ-ASVVAALIPINTALTVGMMKAEVVTMPGIPAEIDPRLISMQVNRQAVPLGTTLMPDMVKGYAP-N  
Canadian eelpout-Q1 -----NK-ASVVAALIPINTALTVGMMKAEVVTMPGIPAEIDPRLISMQVNRQAVPLGTTLMPDMVKGYAP-Q  
spotted wolffish-Q1 mksailtgllfvllcvdhmssaHQ-ASVVAALIPINTALTVGMMKAEVVTMPGIPAEIDPRLISMQVNRQAVPLGTTLMPDMVKGYPP-N  
spotted wolffish-Q2 mksailtgllfvllcvdhmssaHQ-ASVVAALIPINTALTVGMMKAEVVTMPGIPAEIDPRLISMQVNRQAVPLGTTLMPDMVKGYPP-N  
P. brachycephalum-1† mksviltgllfvllcvdhmssaNK-ASVVAALIPINTALTVGMMKAEVVTMPGIPAEIDPRLISMQVNRQAVPLGTTLMPDMVKMYCLCI  
Antarctic eelpout-Q1 mksviltgllfvllcvdhmssaNK-ASVVAALIPINTALTVGMMKAEVVTMPGIPAEIDPRLISMQVNRQAVPLGTTLMPDMVKNY---EK  
Antarctic eelpout-Q2 mksviltgllfvllcvdhmssaNK-ASVVAALIPINTALTVGMMKAEVVTMPGIPAEIDPRLISMQVNRQAVPLGTTLMPDMVKNY---EK  
Antarctic eelpout-Q3a mksviltgllfvllcvdhmssaNK-ASVVAALIPINTALTVGMMKAEVVTMPGIPAEIDPRLISMQVNRQAVPLGTTLMPDMVKNY---EK  
Antarctic eelpout-Q4 mksviltgllfvllcvdhmssaNK-ASVVAALIPINTALTVGMMKAEVVTMPGIPAEIDPRLISMQVNRQAVPLGTTLMPDMVKNY---EK  
Antarctic eelpout-Q3b (tandemer) GTTSPGLKSVVAALIPINTALTVGMMKAEVSPKGPSEISKLVGQVNRQAVPLGTTLMPDMVKNY---EK  
P. brachycephalum-Q2† mksviltgllfvllcvdhmssaNK--SVVAALIPINTALTVGMMKAEVSPKGPSEISKLVGQVNRQAVPLGTTLMPDMVKNY---QK  
Antarctic eelpout-Q5b (tandemer) VTTCPGFKSVVAALIPINTALTVGMMKAEVSPKGPSEISKLVGQVNRQAVPLGTTLMPDMVKNY---ED  
Antarctic eelpout-Q6 -----SVVAALIPINTALTVGMMKAEVSPKGPSEISKLVGQVNRQAVPLGTTLMPDMVKNY---EK  
P. brachycephalum-Q3 -----TK--SVVAALIPINTALTVGMMKAEVSPKGPSEISKLVGQVNRQAVPLGTTLMPDMVKNY---EK  
P. brachycephalum-Q4 mksviltgllfvllcvdhmssaTK--SVVASALIPINTALTVGMMKAEVSPKGPSEISKLVGQVNRQAVPLGTTLMPDMVKTY---QK  
ocean pout-Q6† -----cvdhmssaNQ-ASVVAALIPINTALTVGMMKAEVVTMPGIPAEIDPRLISMQVNRQAVPLGTTLMPDMVKTYCA-AK  
ocean pout-Q7 mksviltgllfvllcvdhmssaNQ-ESVVAALIPINTALTVGMMKAEVVTMPGIPAEIDPRLISMQVNRQAVPLGTTLMPDMVKTYCA-AK  
Antarctic eelpout-sasB -----GKSVVAKVKRIPKGVITVQDMLAVVAAABPMGIAAEIDLCKMVGATVTEDEEDDSVMPDMVKGYCK-NRKC  
wolf eel-sasB -----GKSVVAKVKRIPKGVITVQDMLAVVAAABPMGIAAEIDLCKMVGATVTEDEEDDSVMPDMVKGYCK-NRKC  
Antarctic eelpout-sasA -----GKSVVAKVKRIPKGVITVQDMLAVVAAABPMGIAAEIDLCKMVGATVTEDEEDDSVMPDMVKGYCK-NRKC  
wolf eel-sasA -----GKSVVAKVKRIPKGVITVQDMLAVVAAABPMGIAAEIDLCKMVGATVTEDEEDDSVMPDMVKGYCK-NRKC  
Atlantic wolffish-S1 mksailtgllfvllcvdhmssaSQ-SVVAALIPINTALTVGMMKAEVVTMPGIPAEIDPRLISMQVNRQAVPLGTTLMPDMVKTYRA-AK  
spotted wolffish-S1 mksailtgllfvllcvdhmssaSQ-SVVAALIPINTALTVGMMKAEVVTMPGIPAEIDPRLISMQVNRQAVPLGTTLMPDMVKTYRA-AK  
spotted wolffish-S2 mksailtgllfvllcvdhmssaSQ-SVVAALIPINTALTVGMMKAEVVTMPGIPAEIDPRLISMQVNRQAVPLGTTLMPDMVKTYRA-AK  
rock gunnel-S1\* mksailtgllfvllcvdhmssaSQ-SVVASALIPINTALTVGMMKAEVVTMPGIPAEIDPRLISMQVNRQAVPLGTTLMPDMVKTYRA-AK  
radiated shanny-S1\* mksailtgllfvllcvdhmssaSQ-SVVAALIPINTALTVGMMKAEVVTMPGIPAEIDPRLISMQVNRQAVPLGTTLMPDMVKTYRA-AK  
ocean pout-S1 mksviltgllfvllcvdhm-taSQ-SVVAALIPINTALTVGMMKAEVVTMPGIPAEIDPRLISMQVNRQAVPLGTTLMPDMVKTYRA-AK  
ocean pout-S2\* -----cvdhi-taSQ-SVVAALIPINTALTVGMMKAEVVTMPGIPAEIDPRLISMQVNRQAVPLGTTLMPDMVKTYRA-AK  
ocean pout-S3 mksviltgllfvllcvdhm-taSQ-SVVAALIPINTALTVGMMKAEVVTMPGIPAEIDPRLISMQVNRQAVPLGTTLMPDMVKTYRA-AK  
ocean pout-S4\* -----cvdhm-taSQ-SVVAALIPINTALTVGMMKAEVVTMPGIPAEIDPRLISMQVNRQAVPLGTTLMPDMVKTYRA-AK  
viviparous eelpout-S1 mksviltgllfvllcvdhmssaGE-SVVAALIPINTALTVGMMKAEVVTMPGIPAEIDPRLISMQVNRQAVPLGTTLMPDMVKTYRA-AK  
notched-fin eelpout-S1 mksviltgllfvllcvdhmssaGE-SVVAALIPINTALTVGMMKAEVVTMPGIPAEIDPRLISMQVNRQAVPLGTTLMPDMVKTYRA-AK  
viviparous eelpout-S2 -----GE-SVVAALIPINTALTVGMMKAEVVTMPGIPAEIDPRLISMQVNRQAVPLGTTLMPDMVKTYRA-AK  
viviparous eelpout-S3† mksviltgllfvllcvdhmssaGE-SVVAALIPINTALTVGMMKAEVVTMPGIPAEIDPRLISMQVNRQAVPLGTTLMPDMVKTYRA-AK  
viviparous eelpout-S4† mksviltgllfvllcvdhmssaGE-SVVAALIPINTALTVGMMKAEVVTMPGIPAEIDPRLISMQVNRQAVPLGTTLMPDMVKTYRA-AK  
viviparous eelpout-S5† mksviltgllfvllcvdhmssaGE-SVVAALIPINTALTVGMMKAEVVTMPGIPAEIDPRLISMQVNRQAVPLGTTLMPDMVKTYRA-AK  
notched-fin eelpout-S6 mksviltgllfvllcvdhmssaGE-SVVAALIPINTALTVGMMKAEVVTMPGIPAEIDPRLISMQVNRQAVPLGTTLMPDMVKTYRA-AK  
viviparous-eelpout-S6† mksviltgllfvllcvdhmssaGE-SVVAALIPINTALTVGMMKAEVVTMPGIPAEIDPRLISMQVNRQAVPLGTTLMPDMVKTYRA-AK  
viviparous-eelpout-S7† mksviltgllfvllcvdhm-taGE-SVVAALIPINTALTVGMMKAEVVTMPGIPAEIDPRLISMQVNRQAVPLGTTLMPDMVKTYRA-AK  
viviparous-eelpout-S8† -----hmssaGE-SVVAALIPINTALTVGMMKAEVVTMPGIPAEIDPRLISMQVNRQAVPLGTTLMPDMVKTYRA-AK  
viviparous-eelpout-S9† ----iltgllfvllcvdhmssaGE-SVVAALIPINTALTVGMMKAEVVTMPGIPAEIDPRLISMQVNRQAVPLGTTLMPDMVKTYRA-AK  
viviparous-eelpout-S10† mksviltgllfvllcvdhmssaGE-SVVAALIPINTALTVGMMKAEVVTMPGIPAEIDPRLISMQVNRQAVPLGTTLMPDMVKTYRA-AK  
notched-fin eelpout-S3 mksviltgllfvllcvdhmssaGQ-SVVAALIPINTALTVGMMKAEVVTMPGIPAEIDPRLISMQVNRQAVPLGTTLMPDMVKTYRA-AK  
notched-fin eelpout-S4 mksviltgllfvllcvdhmssaGQ-SVVAALIPINTALTVGMMKAEVVTMPGIPAEIDPRLISMQVNRQAVPLGTTLMPDMVKTYRA-AK

\*:..:.\*:..:\*\*\*\*\* :: :\* \* \*\* \*\* \*\* \*\* : :. : \*\* : \* . \* : \*\*\*
